# Supplementary material for: Distribution and Origin of Major, Trace and Rare Earth Elements in Wild Edible Mushrooms: Urban vs. Forest Areas
Source: MDPI journal article supplement (doi:10.3390/jof7121068), 2021-12-12
Supplement: s1 [file s1]

**Table S1.** Spearman correlation coefficients of the investigated elements in mushrooms. Correlation coefficients marked in red are significant at  $p < 0.05$ .

|      | As    | Ba    | Be    | Bi    | Ca    | Cd    | Co    | Cr    | Cs    | Cu    | Fe    | K     | Li    | Mg    | Mn    |
|------|-------|-------|-------|-------|-------|-------|-------|-------|-------|-------|-------|-------|-------|-------|-------|
| Al   | -0.22 | 0.81  | -0.48 | -0.06 | 0.52  | -0.16 | 0.28  | -0.02 | 0.50  | -0.39 | 0.40  | 0.18  | 0.69  | -0.25 | 0.32  |
| As   |       | -0.01 | 0.14  | 0.23  | 0.21  | -0.13 | -0.01 | -0.32 | -0.15 | 0.61  | 0.01  | -0.23 | -0.50 | 0.02  | 0.14  |
| Ba   |       |       | -0.45 | -0.02 | 0.62  | -0.32 | 0.09  | -0.14 | 0.21  | -0.09 | 0.50  | 0.14  | 0.67  | -0.16 | 0.32  |
| Be   |       |       |       | 0.25  | -0.32 | -0.03 | -0.37 | -0.21 | -0.50 | 0.01  | -0.34 | -0.58 | -0.45 | -0.27 | -0.26 |
| Bi   |       |       |       |       | -0.26 | 0.07  | -0.08 | -0.45 | 0.04  | 0.11  | -0.09 | -0.14 | 0.06  | 0.14  | -0.29 |
| Ca   |       |       |       |       |       | -0.25 | 0.22  | 0.09  | 0.08  | -0.01 | 0.10  | 0.21  | 0.27  | -0.23 | 0.17  |
| Cd   |       |       |       |       |       |       | -0.11 | 0.36  | 0.53  | -0.36 | -0.30 | 0.43  | 0.25  | 0.41  | -0.73 |
| Co   |       |       |       |       |       |       |       | 0.36  | 0.10  | 0.22  | 0.47  | 0.01  | 0.02  | 0.04  | 0.39  |
| Cr   |       |       |       |       |       |       |       |       | -0.04 | -0.13 | 0.25  | 0.05  | 0.04  | 0.00  | -0.11 |
| Cs   |       |       |       |       |       |       |       |       |       | -0.36 | -0.09 | 0.51  | 0.53  | 0.08  | -0.19 |
| Cu   |       |       |       |       |       |       |       |       |       |       | 0.44  | -0.32 | -0.54 | -0.05 | 0.40  |
| Fe   |       |       |       |       |       |       |       |       |       |       |       | -0.23 | 0.19  | -0.12 | 0.62  |
| K    |       |       |       |       |       |       |       |       |       |       |       |       | 0.46  | 0.60  | -0.21 |
| Li   |       |       |       |       |       |       |       |       |       |       |       |       |       | 0.07  | -0.15 |
| Mg   |       |       |       |       |       |       |       |       |       |       |       |       |       |       | -0.25 |
|      | Mo    | Na    | Ni    | Pb    | Rb    | Sb    | Se    | Sn    | Sr    | Ti    | Tl    | U     | V     | Zn    | ΣREE  |
| Al   | -0.33 | 0.14  | 0.19  | -0.06 | 0.56  | -0.15 | 0.07  | 0.04  | 0.58  | 0.87  | 0.35  | -0.06 | 0.71  | 0.06  | 0.82  |
| As   | 0.42  | -0.39 | 0.26  | 0.07  | -0.16 | 0.15  | -0.41 | -0.14 | 0.24  | -0.29 | 0.08  | 0.07  | 0.04  | 0.43  | -0.15 |
| Ba   | 0.00  | 0.21  | 0.27  | -0.24 | 0.19  | 0.32  | -0.10 | 0.13  | 0.70  | 0.80  | 0.15  | 0.11  | 0.77  | 0.12  | 0.81  |
| Be   | 0.13  | -0.40 | -0.15 | -0.18 | -0.46 | -0.12 | -0.40 | -0.21 | -0.56 | -0.50 | -0.16 | 0.19  | -0.43 | 0.15  | -0.39 |
| Bi   | -0.20 | -0.15 | -0.09 | 0.08  | -0.04 | 0.11  | 0.18  | -0.11 | -0.04 | 0.06  | 0.14  | 0.01  | -0.20 | 0.58  | 0.05  |
| Ca   | 0.07  | 0.18  | 0.18  | -0.12 | 0.21  | 0.12  | -0.28 | 0.18  | 0.77  | 0.52  | 0.31  | -0.19 | 0.04  | -0.03 | 0.54  |
| Cd   | -0.64 | 0.15  | -0.28 | -0.10 | 0.51  | -0.31 | 0.28  | -0.35 | -0.06 | 0.00  | 0.47  | 0.14  | -0.37 | 0.00  | -0.1  |
| Co   | -0.02 | 0.18  | 0.39  | 0.80  | 0.13  | -0.01 | 0.05  | 0.22  | 0.18  | 0.10  | 0.08  | 0.13  | 0.41  | 0.32  | 0.32  |
| Cr   | -0.30 | 0.09  | 0.22  | 0.16  | 0.16  | -0.12 | 0.02  | 0.34  | 0.11  | -0.07 | -0.05 | 0.17  | 0.02  | -0.07 | 0.10  |
| Cs   | -0.43 | 0.17  | -0.08 | 0.03  | 0.85  | -0.23 | 0.29  | -0.27 | 0.22  | 0.52  | 0.65  | -0.20 | 0.14  | -0.08 | 0.35  |
| Cu   | 0.69  | -0.36 | 0.42  | 0.40  | -0.46 | 0.44  | -0.36 | 0.12  | -0.02 | -0.31 | -0.33 | 0.08  | 0.07  | 0.24  | -0.22 |
| Fe   | 0.16  | -0.12 | 0.53  | 0.29  | -0.05 | 0.23  | -0.22 | 0.17  | 0.21  | 0.32  | -0.22 | 0.27  | 0.66  | 0.23  | 0.39  |
| K    | -0.34 | 0.70  | -0.56 | -0.12 | 0.49  | 0.09  | 0.62  | -0.25 | 0.45  | 0.34  | 0.48  | -0.35 | -0.05 | -0.40 | 0.03  |
| Li   | -0.46 | 0.44  | -0.04 | -0.23 | 0.43  | 0.01  | 0.34  | 0.02  | 0.39  | 0.80  | 0.37  | 0.08  | 0.44  | -0.04 | 0.68  |
| Mg   | -0.30 | 0.39  | -0.53 | 0.01  | 0.01  | 0.15  | 0.50  | -0.09 | 0.12  | -0.14 | 0.3   | 0.04  | -0.33 | 0.13  | -0.33 |
|      | Mo    | Na    | Ni    | Pb    | Rb    | Sb    | Se    | Sn    | Sr    | Ti    | Tl    | U     | V     | Zn    | ΣREE  |
| Mn   | 0.55  | -0.07 | 0.31  | 0.34  | -0.14 | 0.20  | -0.18 | 0.11  | 0.08  | 0.04  | -0.33 | -0.07 | 0.57  | -0.04 | 0.05  |
| Na   |       | -0.19 | 0.31  | 0.22  | -0.60 | 0.56  | -0.48 | 0.14  | -0.17 | -0.38 | -0.38 | -0.05 | 0.20  | -0.04 | -0.25 |
| Ni   |       |       | -0.45 | -0.06 | 0.23  | 0.30  | 0.37  | -0.27 | 0.21  | 0.19  | 0.09  | -0.15 | 0.10  | -0.43 | 0.09  |
| Pb   |       |       |       | 0.34  | -0.16 | 0.06  | -0.33 | 0.48  | 0.12  | 0.07  | -0.31 | 0.47  | 0.53  | 0.40  | 0.48  |
| Rb   |       |       |       |       | -0.01 | 0.04  | 0.07  | 0.16  | -0.13 | -0.15 | -0.02 | 0.04  | 0.20  | 0.38  | -0.01 |
| Sb   |       |       |       |       |       | -0.36 | 0.24  | -0.39 | 0.35  | 0.53  | 0.56  | -0.29 | 0.15  | -0.17 | 0.33  |
| Se   |       |       |       |       |       |       | -0.16 | 0.14  | 0.19  | -0.06 | -0.15 | 0.05  | 0.19  | 0.11  | 0.03  |
| Sn   |       |       |       |       |       |       |       | 0.08  | 0.14  | 0.15  | 0.05  | -0.05 | -0.17 | -0.14 | -0.02 |
| Sr   |       |       |       |       |       |       |       |       | 0.17  | 0.01  | -0.24 | 0.19  | 0.05  | 0.30  | 0.25  |
| Ti   |       |       |       |       |       |       |       |       |       | 0.63  | 0.35  | -0.11 | 0.46  | 0.12  | 0.62  |
| Tl   |       |       |       |       |       |       |       |       |       |       | 0.41  | -0.16 | 0.57  | -0.02 | 0.82  |
| U    |       |       |       |       |       |       |       |       |       |       |       | -0.37 | 0.03  | 0.19  | 0.26  |
| V    |       |       |       |       |       |       |       |       |       |       |       |       | 0.14  | 0.44  | 0.15  |
| Zn   |       |       |       |       |       |       |       |       |       |       |       |       |       | 0.14  | 0.73  |
| ΣREE |       |       |       |       |       |       |       |       |       |       |       |       |       |       | 0.24  |
